# Supplementary material for: Large-scale production of spherical Y2O3:Eu3+ phosphor powders with narrow size distribution using a two-step spray drying method
Source: Royal Society of Chemistry journal article supplement (doi:10.1039/c4ra09225b), 2014-01-01
Supplement: c4ra09225b1.pdf [file c4ra09225b1.pdf]

## Supporting Information

### **Large-scale production of spherical $\text{Y}_2\text{O}_3\text{:Eu}^{3+}$ phosphor powders with narrow size distribution using a two-step spray drying method**

Jung Sang Cho<sup>[a]</sup>, Kyeong Youl Jung<sup>[b]</sup>, Mun Young Son<sup>[c]</sup>, Yun Chan Kang<sup>\*[a]</sup>

<sup>[a]</sup> Department of Materials Science and Engineering, Korea University, Anam-Dong, Seongbuk-Gu, Seoul 136-713, Republic of Korea

<sup>[b]</sup> Department of Chemical Engineering, Kongju National University, 1223-24 Cheonan-Daero, Seobuk-gu, Cheonan, Republic of Korea

<sup>[c]</sup> Department of Chemical Engineering, Konkuk University, 1 Hwayang-dong, Gwangjin-gu, Seoul 143-701, Republic of Korea

#### **This file includes:**

- Schematic diagram and digital photo of spray dryer applied in the preparation of precursor powders.
- TG analysis of the  $\text{Y}_2\text{O}_3\text{:Eu}^{3+}$  precursor powders directly prepared by first-step spray drying.
- Particle size distributions of the  $\text{Y}_2\text{O}_3\text{:Eu}^{3+}$  phosphor powders before and after sintering process.
- $\text{N}_2$  adsorption-desorption isotherms measured at 77 K for the  $\text{Y}_2\text{O}_3\text{:Eu}^{3+}$  phosphor powders formed at the various sintering temperatures.
- XRD patterns of the  $\text{Y}_2\text{O}_3\text{:Eu}^{3+}$  phosphor powders formed at the various sintering temperatures.

- Excitation and emission spectra of the  $\text{Y}_2\text{O}_3:\text{Eu}^{3+}$  phosphor powders prepared by spray drying method and the commercial  $\text{Y}_2\text{O}_3:\text{Eu}^{3+}$  product.
- XRD patterns of the (a) first spray dried, and (b) crushed  $\text{Y}_2\text{O}_3:\text{Eu}^{3+}$  phosphor powders.

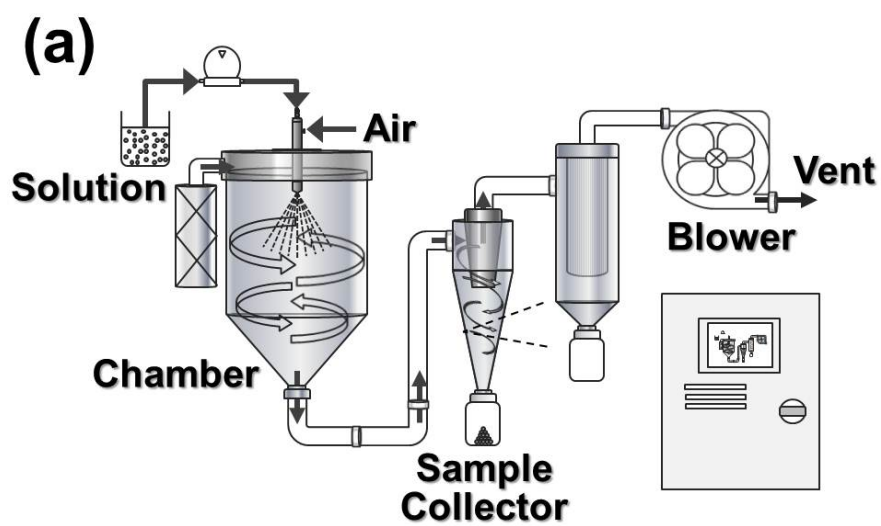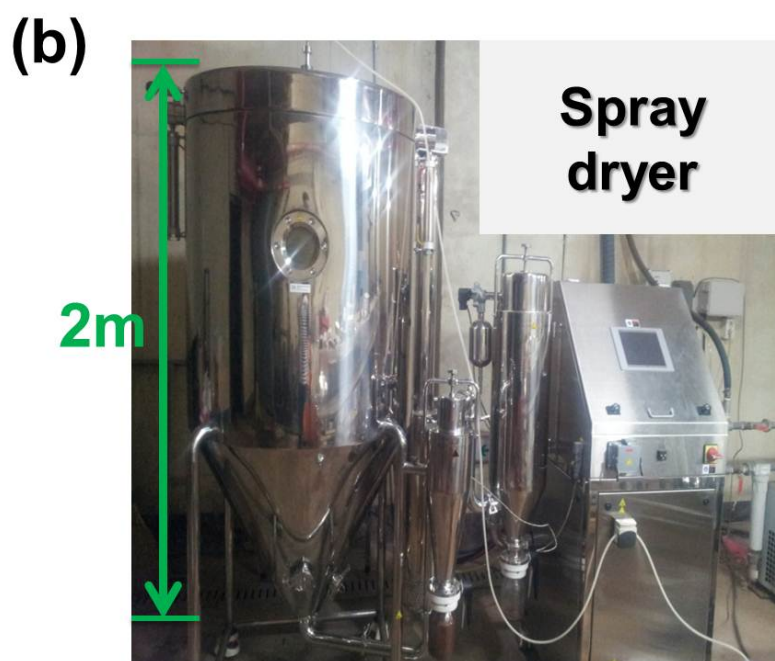

**Figure S1.** Schematic diagram and digital photo of spray dryer applied in the preparation of precursor powders.

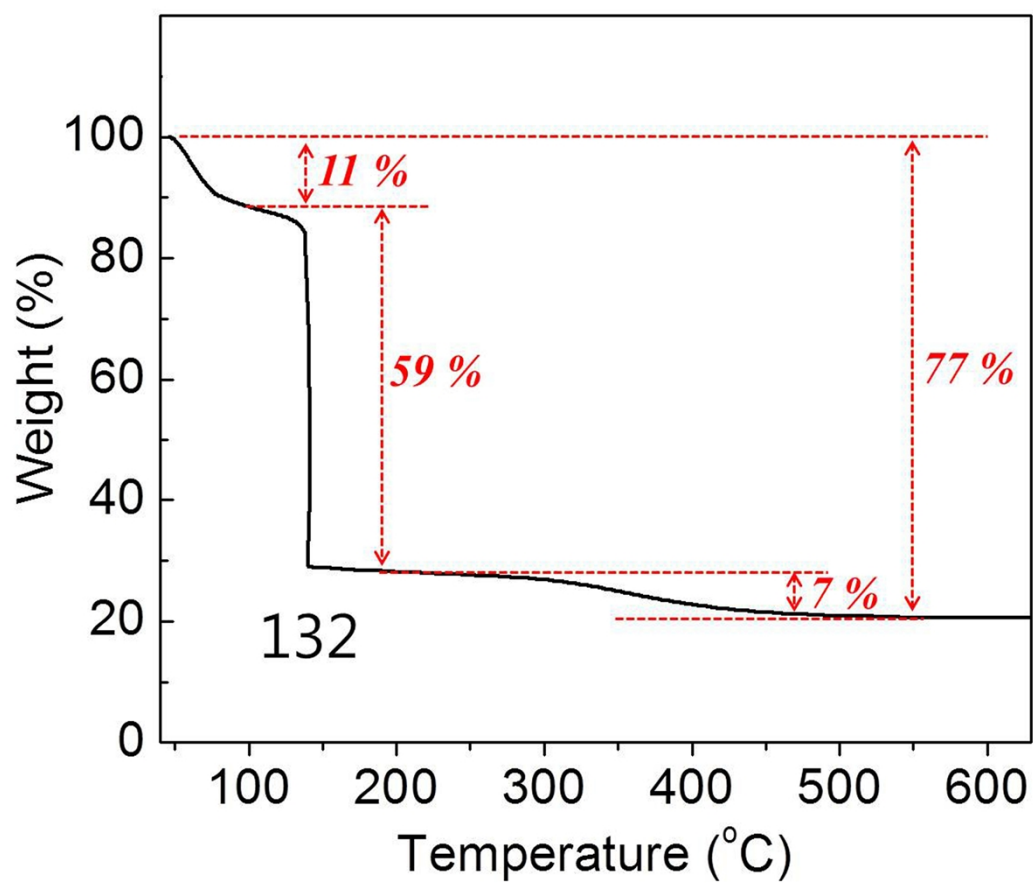

**Figure S2.** TG analysis of the Y<sub>2</sub>O<sub>3</sub>:Eu<sup>3+</sup> precursor powders directly prepared by first-step spray drying.

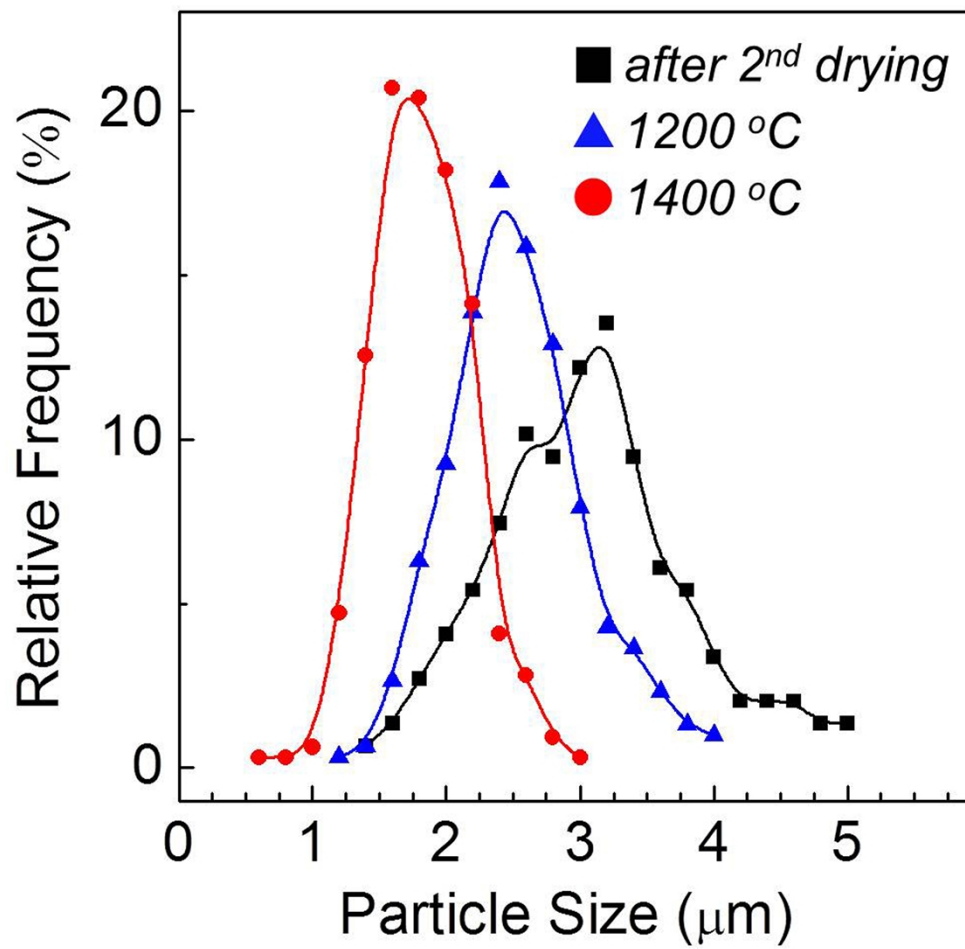

**Figure S3.** Particle size distributions of the  $\text{Y}_2\text{O}_3:\text{Eu}^{3+}$  phosphor powders before and after sintering process.

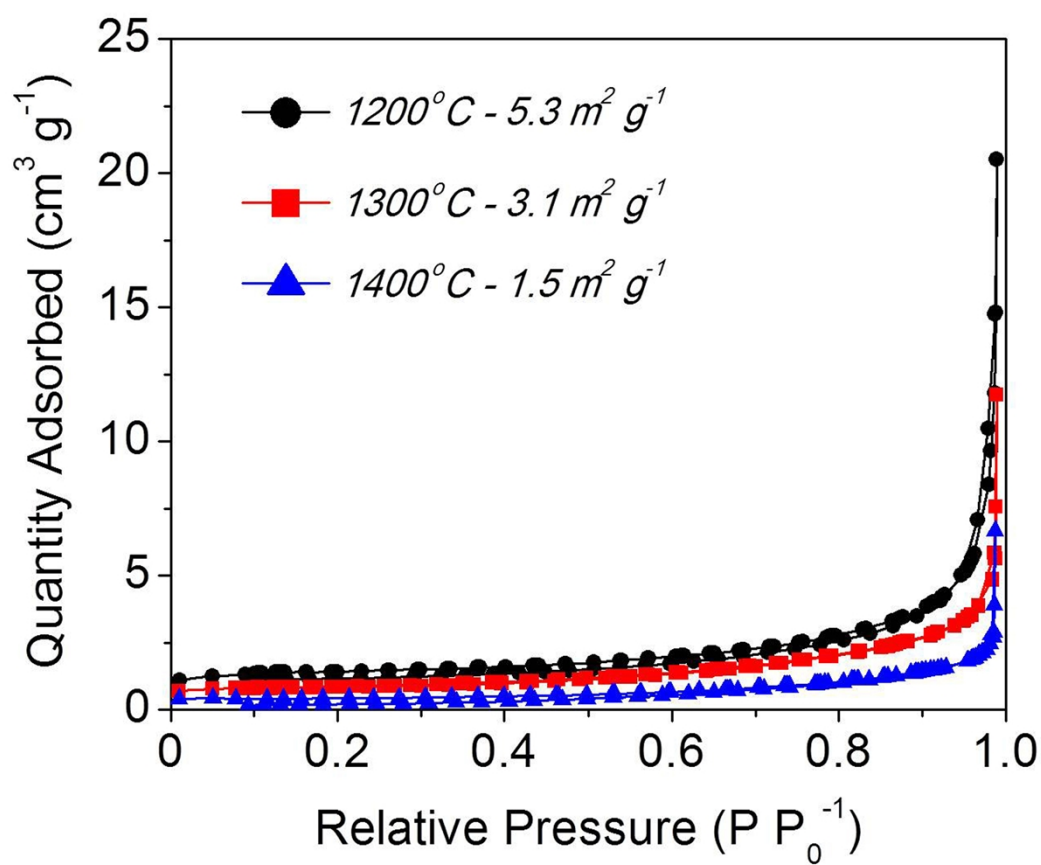

**Figure S4.** N<sub>2</sub> adsorption-desorption isotherms measured at 77 K for the Y<sub>2</sub>O<sub>3</sub>:Eu<sup>3+</sup> phosphor powders formed at the various sintering temperatures.

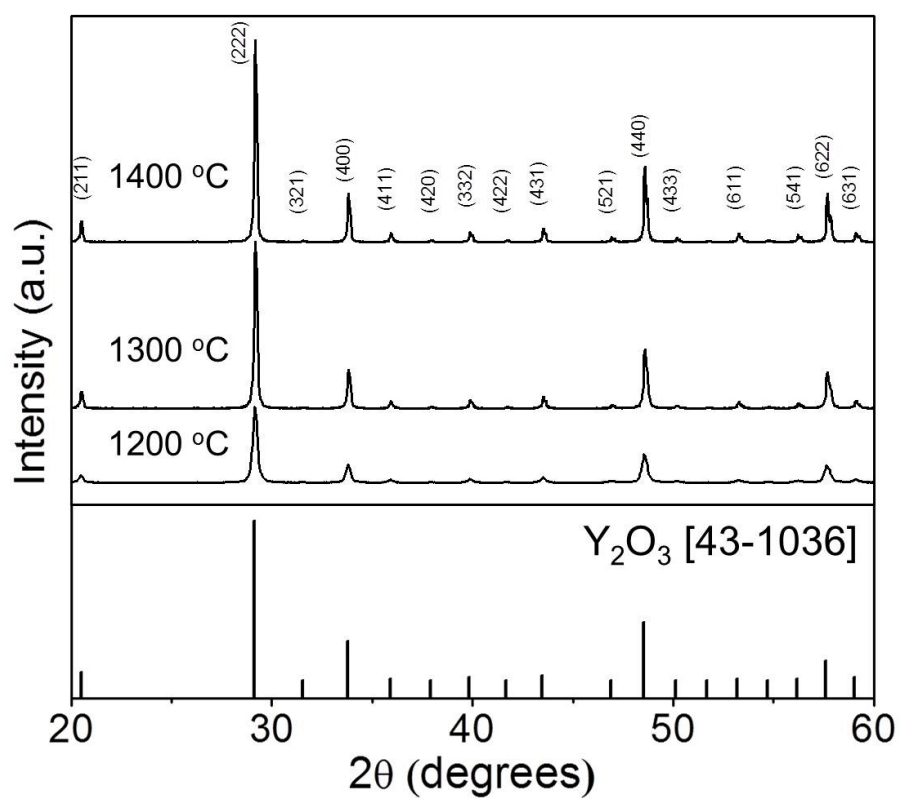

**Figure S5.** XRD patterns of the  $\text{Y}_2\text{O}_3:\text{Eu}^{3+}$  phosphor powders formed at the various sintering temperatures.

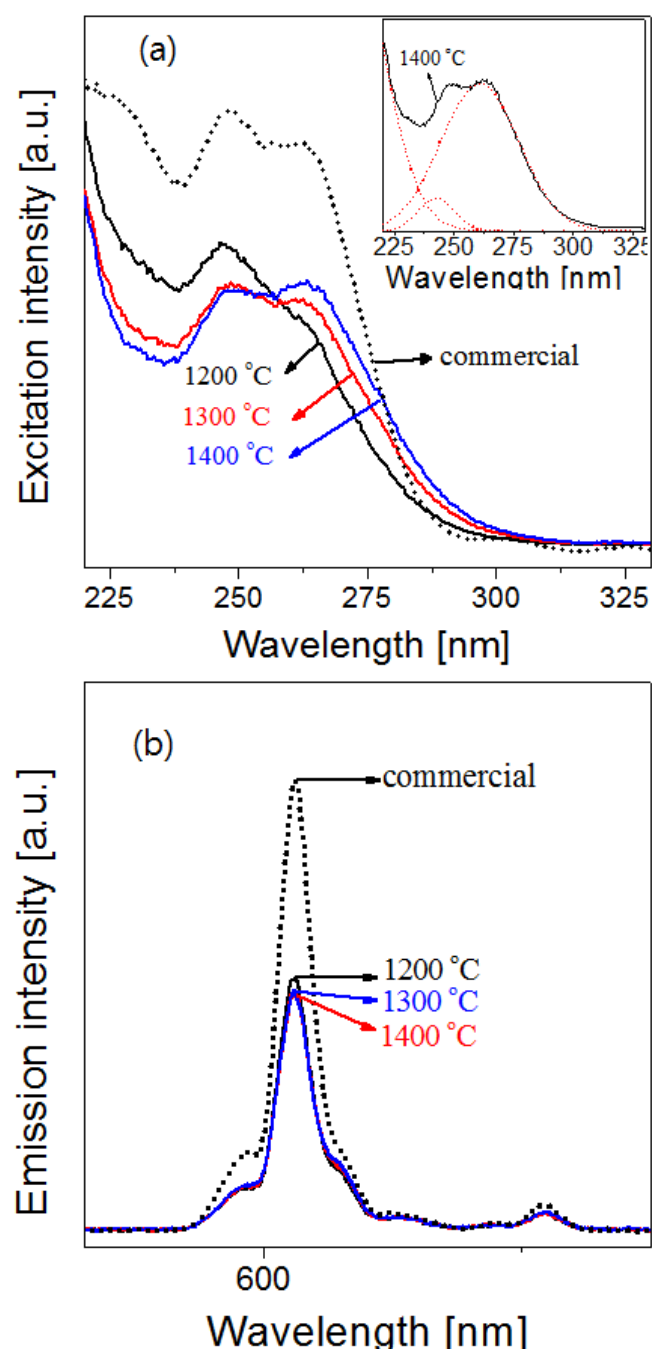

**Figure S6.** Excitation and emission spectra of the  $\text{Y}_2\text{O}_3:\text{Eu}^{3+}$  phosphor powders prepared by spray drying method and the commercial  $\text{Y}_2\text{O}_3:\text{Eu}^{3+}$  product.

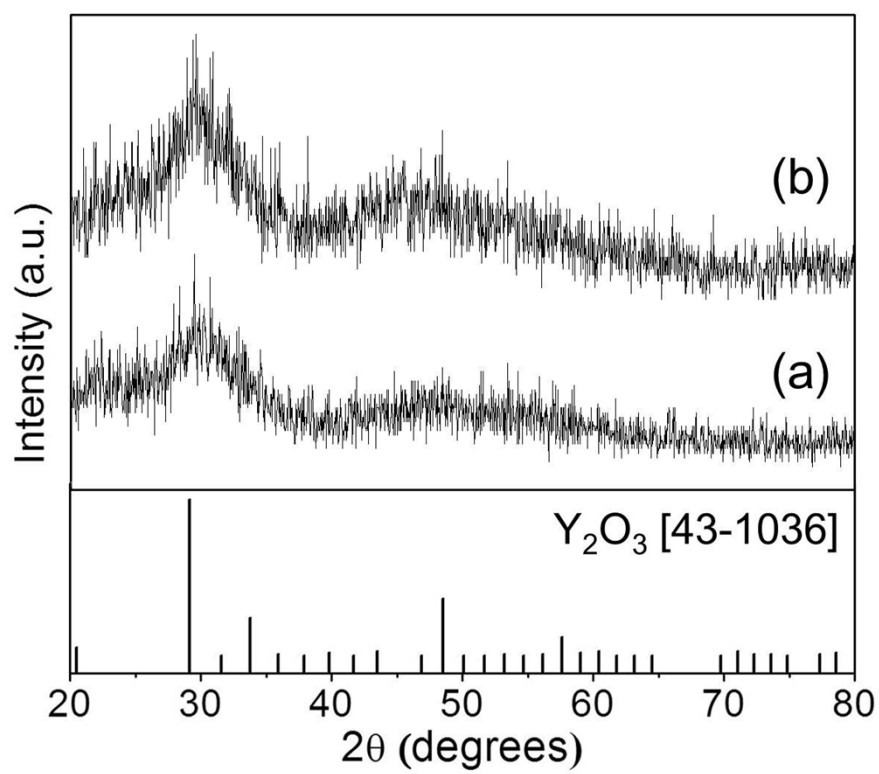

**Figure S7.** XRD patterns of the (a) first spray dried, and (b) crushed  $\text{Y}_2\text{O}_3:\text{Eu}^{3+}$  phosphor powders.
